# Supplementary material for: Composition Profiler: a tool for discovery and visualization of amino acid composition differences
Source: Springer Nature journal article supplement (doi:10.1186/1471-2105-8-211), 2007-06-19

**A**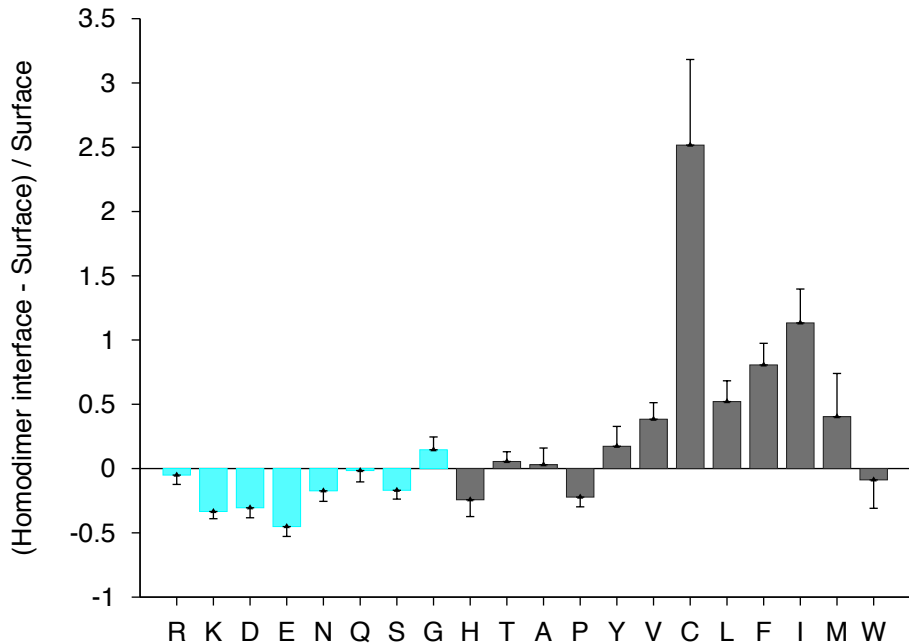**B**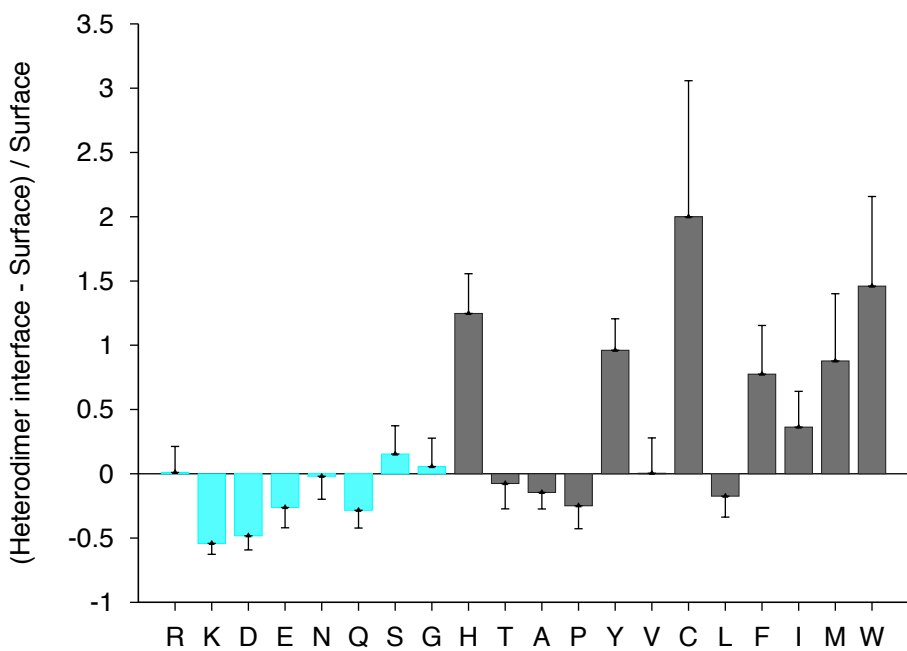**C**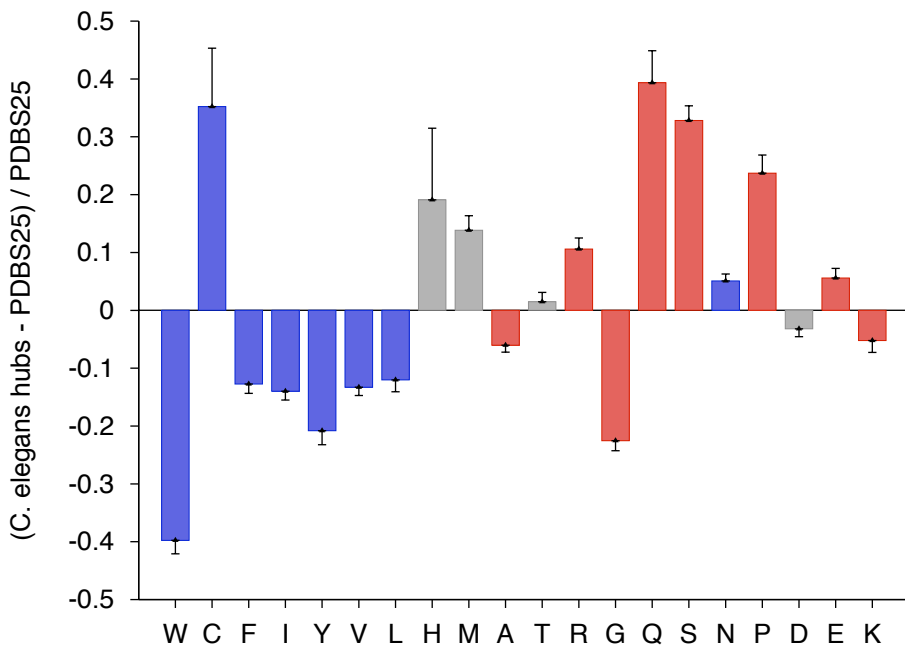

Supplement: 12859_2007_1583_MOESM1_ESM.pdf [file 12859_2007_1583_MOESM1_ESM.pdf]
